# Supplementary material for: Sex differences in IL-17 contribute to chronicity in male versus female urinary tract infection
Source: JCI journal article supplement (doi:10.1172/jci.insight.122998), 2019-05-30
Supplement: sd1 [file 1]

## **Sex differences in IL-17 contribute to chronicity in male versus female urinary tract infection**

Anna Zychlinsky Scharff<sup>1,2,‡</sup>, Matthieu Rousseau<sup>1,2,‡</sup>, Livia Lacerda Mariano<sup>1,2</sup>, Tracy Canton<sup>1,2</sup>, Camila Rosat Consiglio<sup>1,2</sup>, Matthew L Albert<sup>1,2,†</sup>, Magnus Fontes<sup>3,4,5,†</sup>, Darragh Duffy<sup>1,2</sup>, Molly A Ingersoll<sup>1,2,\*</sup>

<sup>1</sup>Unit of Dendritic Cell Immunobiology, Department of Immunology, Institut Pasteur, 75015 Paris, France

<sup>2</sup>INSERM U1223, 75015 Paris, France

<sup>3</sup>International Group for Data Analysis, Institut Pasteur, 75015 Paris, France

<sup>4</sup>The Centre for Mathematical Sciences, Lund University, 221 00 Lund, Sweden

<sup>5</sup>The Center for Genomic Medicine at Rigshospitalet & Persimune, Copenhagen, Denmark

†Current address: Department of Cancer Immunology, Genentech Inc, South San Francisco, California, U.S.A

‡ These authors contributed equally

\*Corresponding author:

Molly A. Ingersoll

[molly.ingersoll@pasteur.fr](mailto:molly.ingersoll@pasteur.fr)

Institut Pasteur

25 Rue du Dr Roux

75015 Paris, France

+33 1 45 68 80 71

**Conflict of interest:** The authors have declared that no conflict of interest exists.

## Supplementary Materials:

Figure S1.

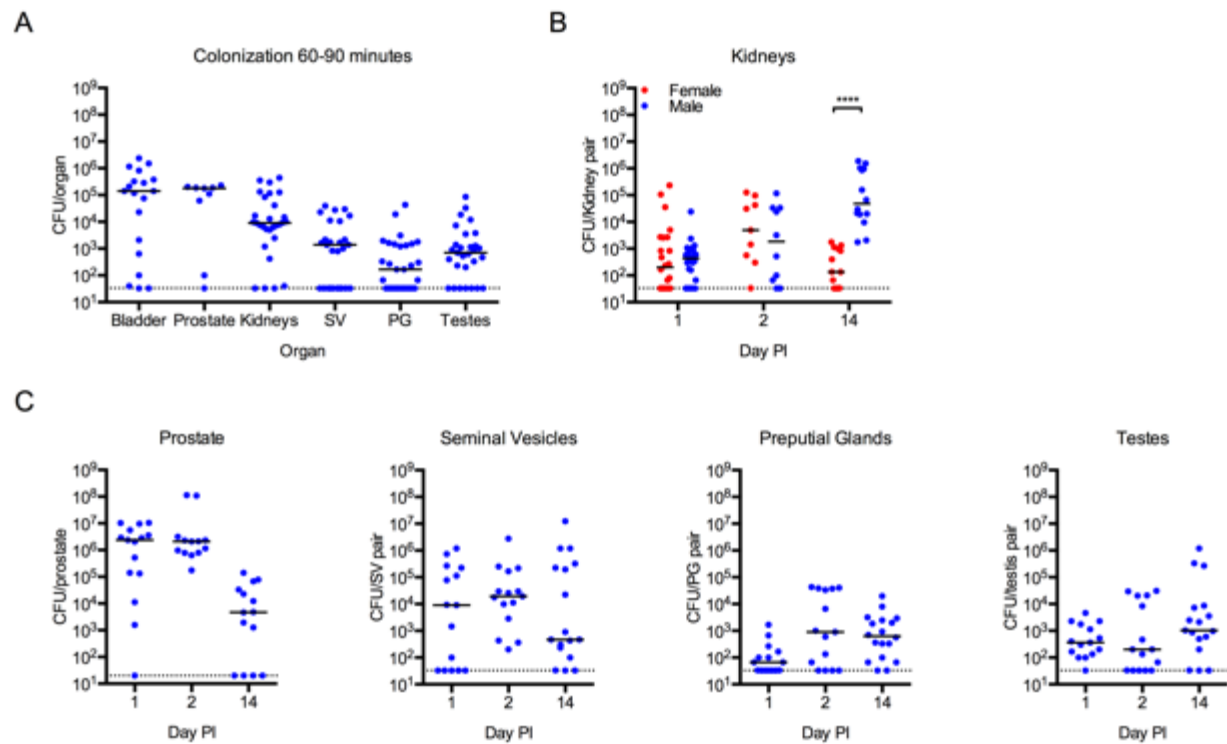

**Figure S1. Male mice are colonized by uropathogenic *E. coli* following intravesical instillation via the urethra.** (A) Male C57BL/6J mice were infected with  $10^7$  colony forming units (CFU) of UPEC strain UTI89-RFP-kan<sup>R</sup> and CFU/organ was determined 60-90 minutes post-infection (PI). (B) Female and male mice were infected with  $10^7$  CFU of UPEC strain UTI89-GFP-amp<sup>R</sup> or UTI89-RFP-kan<sup>R</sup> and CFU/kidney pair was determined at the indicated times PI. (C) Graphs depict CFU/organ in male mice infected with  $10^7$  CFU of UPEC at the indicated times PI. Data are pooled from 2-4 experiments, n=4-10 mice/group in each experiment. Each dot represents one mouse. Dotted lines depict the limit of detection for the assay, 20 or 33 CFU/organ.

**Figure S2.**

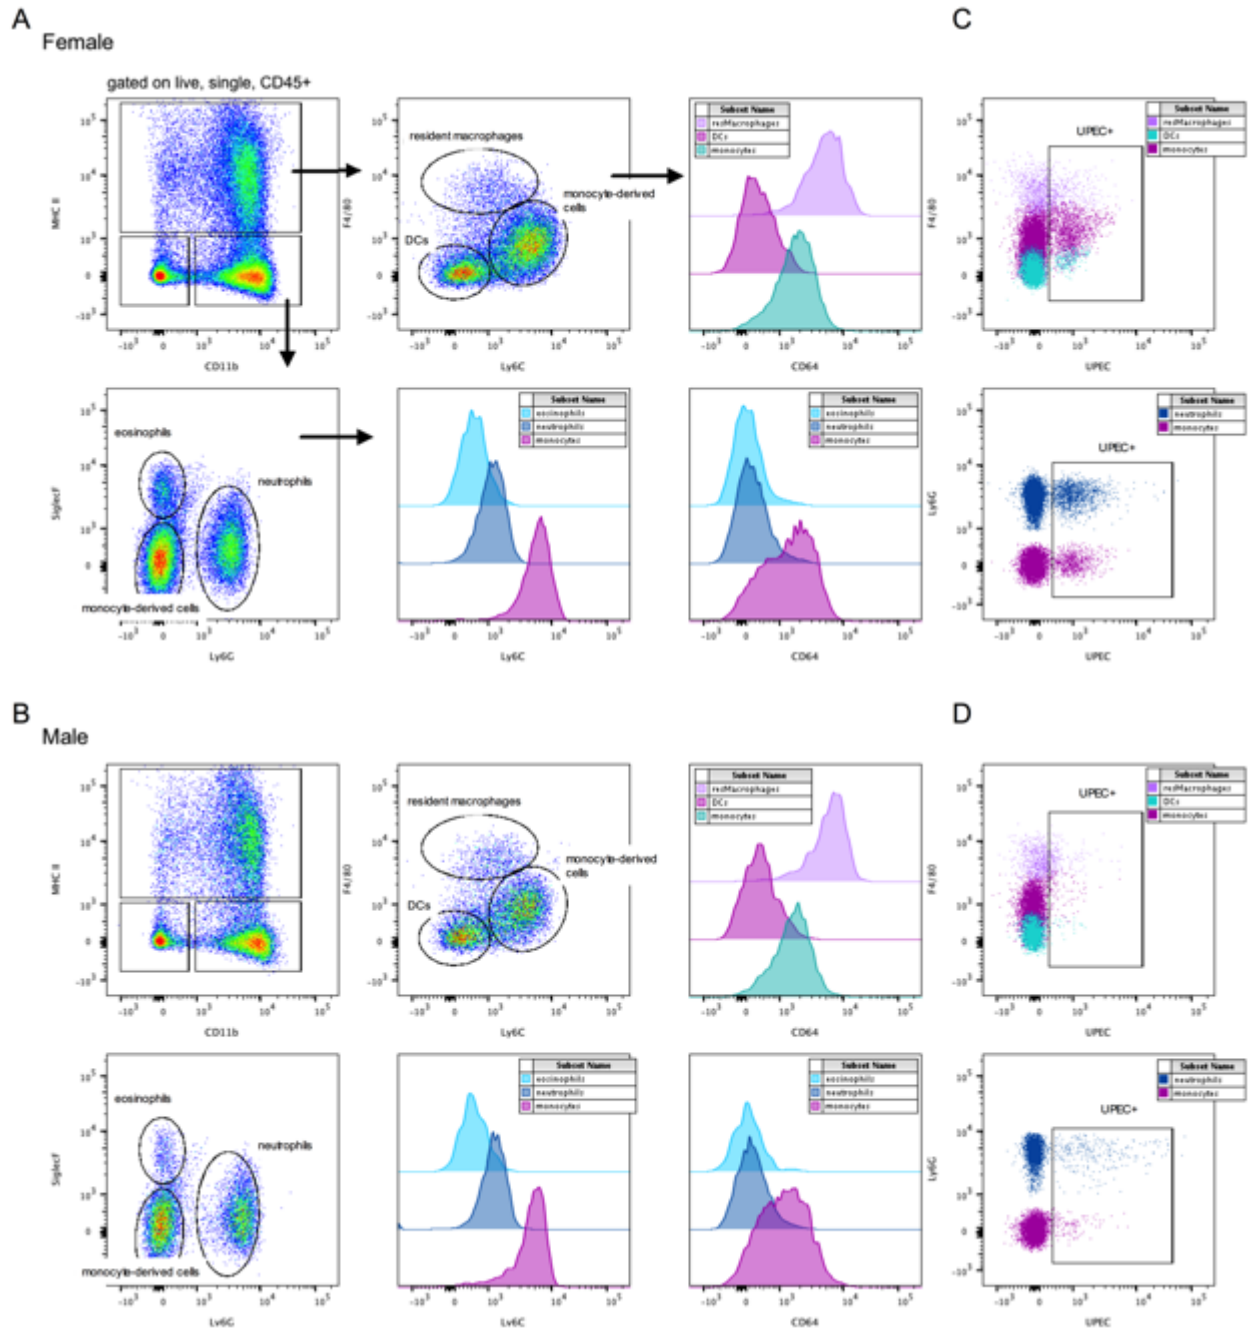

**Figure S2. Gating strategy to identify immune cells and UPEC<sup>+</sup> immune cells.** Plots demonstrate the gating strategies used for analyses shown in **Figures 3** and **4**. Representative plots for **(A)** female and **(B)** male mice are shown. Following infection with  $10^7$  CFU UPEC strain UTI89-RFP-kan<sup>R</sup>, bladders were digested and immunostained as described in the Methods and (32). Each sample, consisting of a single

bladder, was acquired on a BD Fortessa SORP. To identify infiltrating immune cells, samples were gated on CD45<sup>+</sup> cells, excluding doublets. Resident macrophages (resMacrophages) were identified as MHC II<sup>+</sup> CD11b<sup>+</sup> F4/80<sup>+</sup> CD64<sup>+</sup> Ly6C<sup>-</sup> Ly6G<sup>-</sup>, dendritic cells (DCs) were MHC II<sup>+</sup> CD11b<sup>+/+</sup> CD103<sup>+/+</sup> CD11c<sup>+</sup> F4/80<sup>-</sup> CD64<sup>-</sup> Ly6C<sup>+/+</sup> Ly6G<sup>-</sup>, monocyte-derived cells (monocytes) were CD11b<sup>+</sup> Ly6G<sup>-</sup> Ly6C<sup>+</sup> MHC II<sup>-</sup> or MHC II<sup>+</sup> F4/80<sup>int</sup> CD64<sup>int</sup>, neutrophils were identified as CD11b<sup>+</sup> Ly6G<sup>+</sup> MHC II<sup>-</sup> F4/80<sup>-</sup> CD64<sup>-</sup>, eosinophils were CD11b<sup>+</sup> SiglecF<sup>+</sup> Ly6G<sup>-</sup> MHC II<sup>-</sup> F4/80<sup>int</sup> CD64<sup>-</sup>. **(C-D)** UPEC<sup>+</sup> immune cells were identified by population as specified above and then all RFP<sup>+</sup> cells were gated in **(C)** female mice or **(D)** male mice.

**Figure S3.**

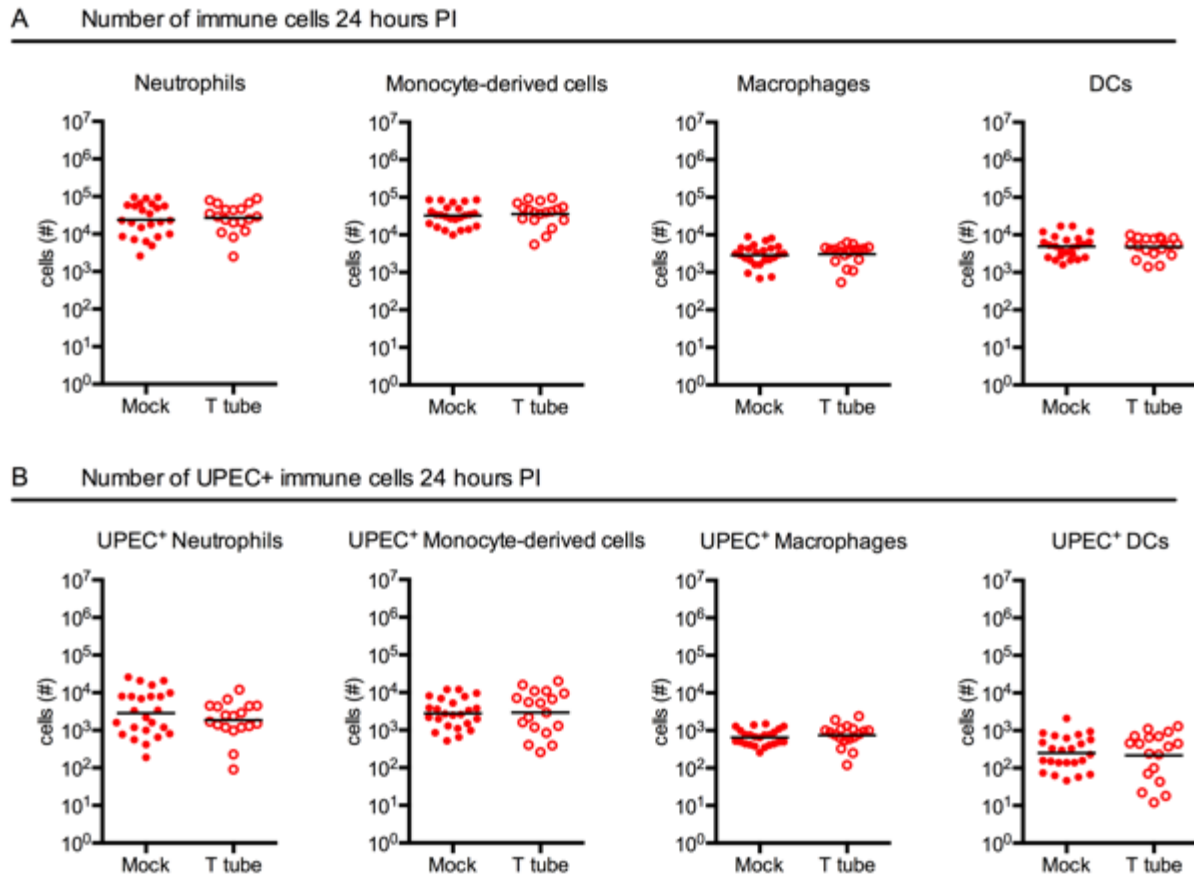

**Figure S3. Testosterone treatment in female mice does not alter immune cell infiltration or bacterial phagocytosis.** (A-B) Female C57BL/6J mice were implanted with empty tubing (Mock) or slow release tubing containing testosterone (T tube) and allowed to recover 1 week before infection with  $10^7$  CFU UPEC. Graphs show the absolute number of (A) infiltrating immune cells and (B) UPEC<sup>+</sup> immune cells at 24 hours PI. Data are pooled from 4 experiments, n=4-5 mice/group in each experiment, each dot is one mouse, lines are medians. Mann-Whitney test, no statistically significant differences found.

**Figure S4.**

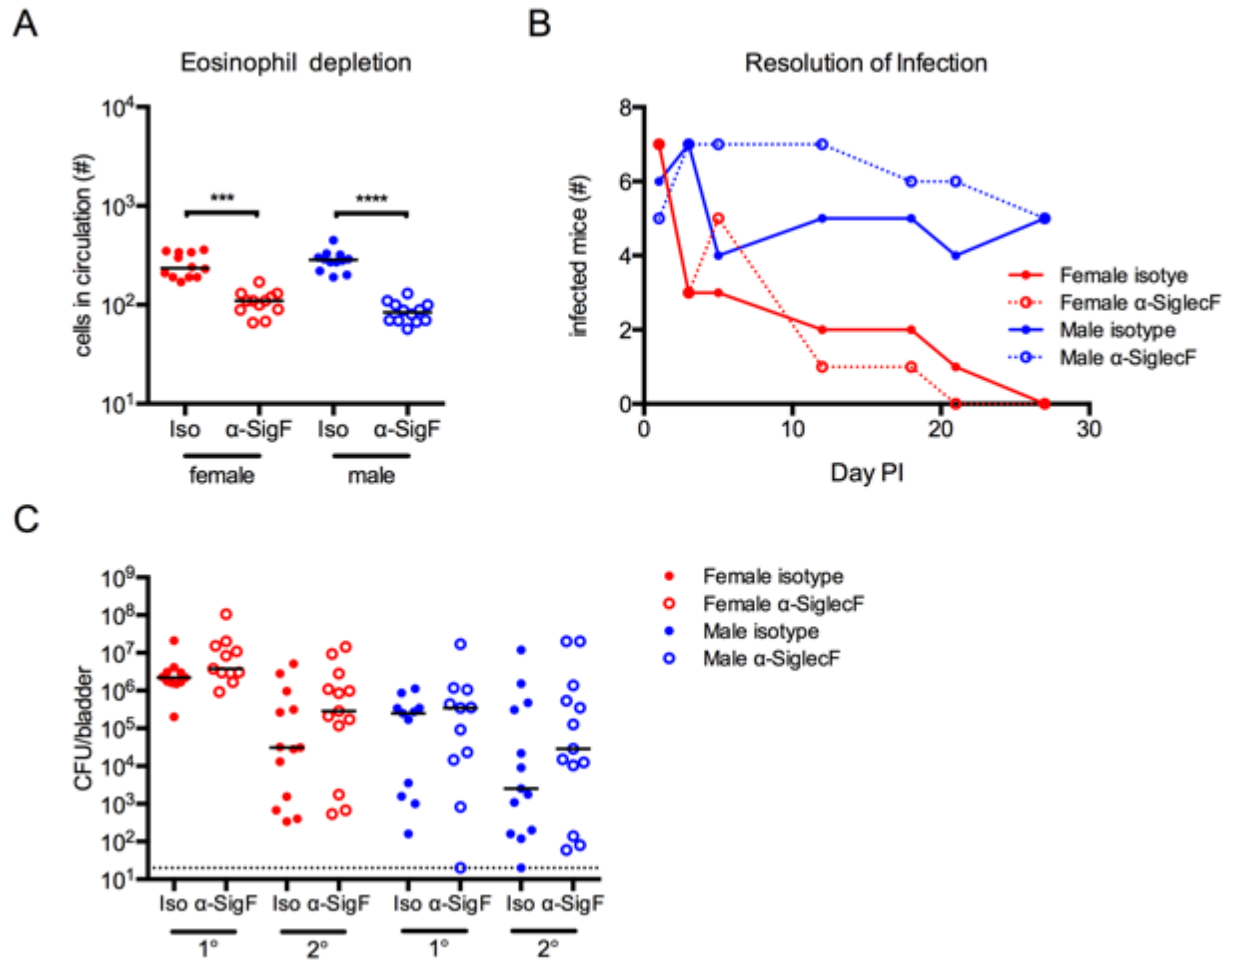

**Figure S4. Eosinophils do not mediate resolution of UTI.** (A-B) Female and male C57BL/6J mice were treated with  $\alpha$ -SiglecF ( $\alpha$ -SigF) antibody or isotype (Iso) control and infected with  $10^7$  CFU UPEC. Graphs depict the (A) number of eosinophils in circulation per  $\mu$ L blood in control and treated mice on the day of infection, (B) number of infected mice determined by urine sampling over time, (C) CFU at 24 hours post primary (1°) or challenge (2°) infection in the bladder. In A and C, data are pooled from 2 experiments, n=6-7 mice/group in each experiment, each dot is one mouse, lines are medians. Data in B are representative of 3 independent experiments, n=6 mice/group/experiment. \*\*\* p<0.001, \*\*\*\* p<0.0001 Kruskal-Wallis test comparing isotype to  $\alpha$ -SiglecF-treated mice within a single sex, with Dunn's post-test to correct for multiple comparisons.

Figure S5.

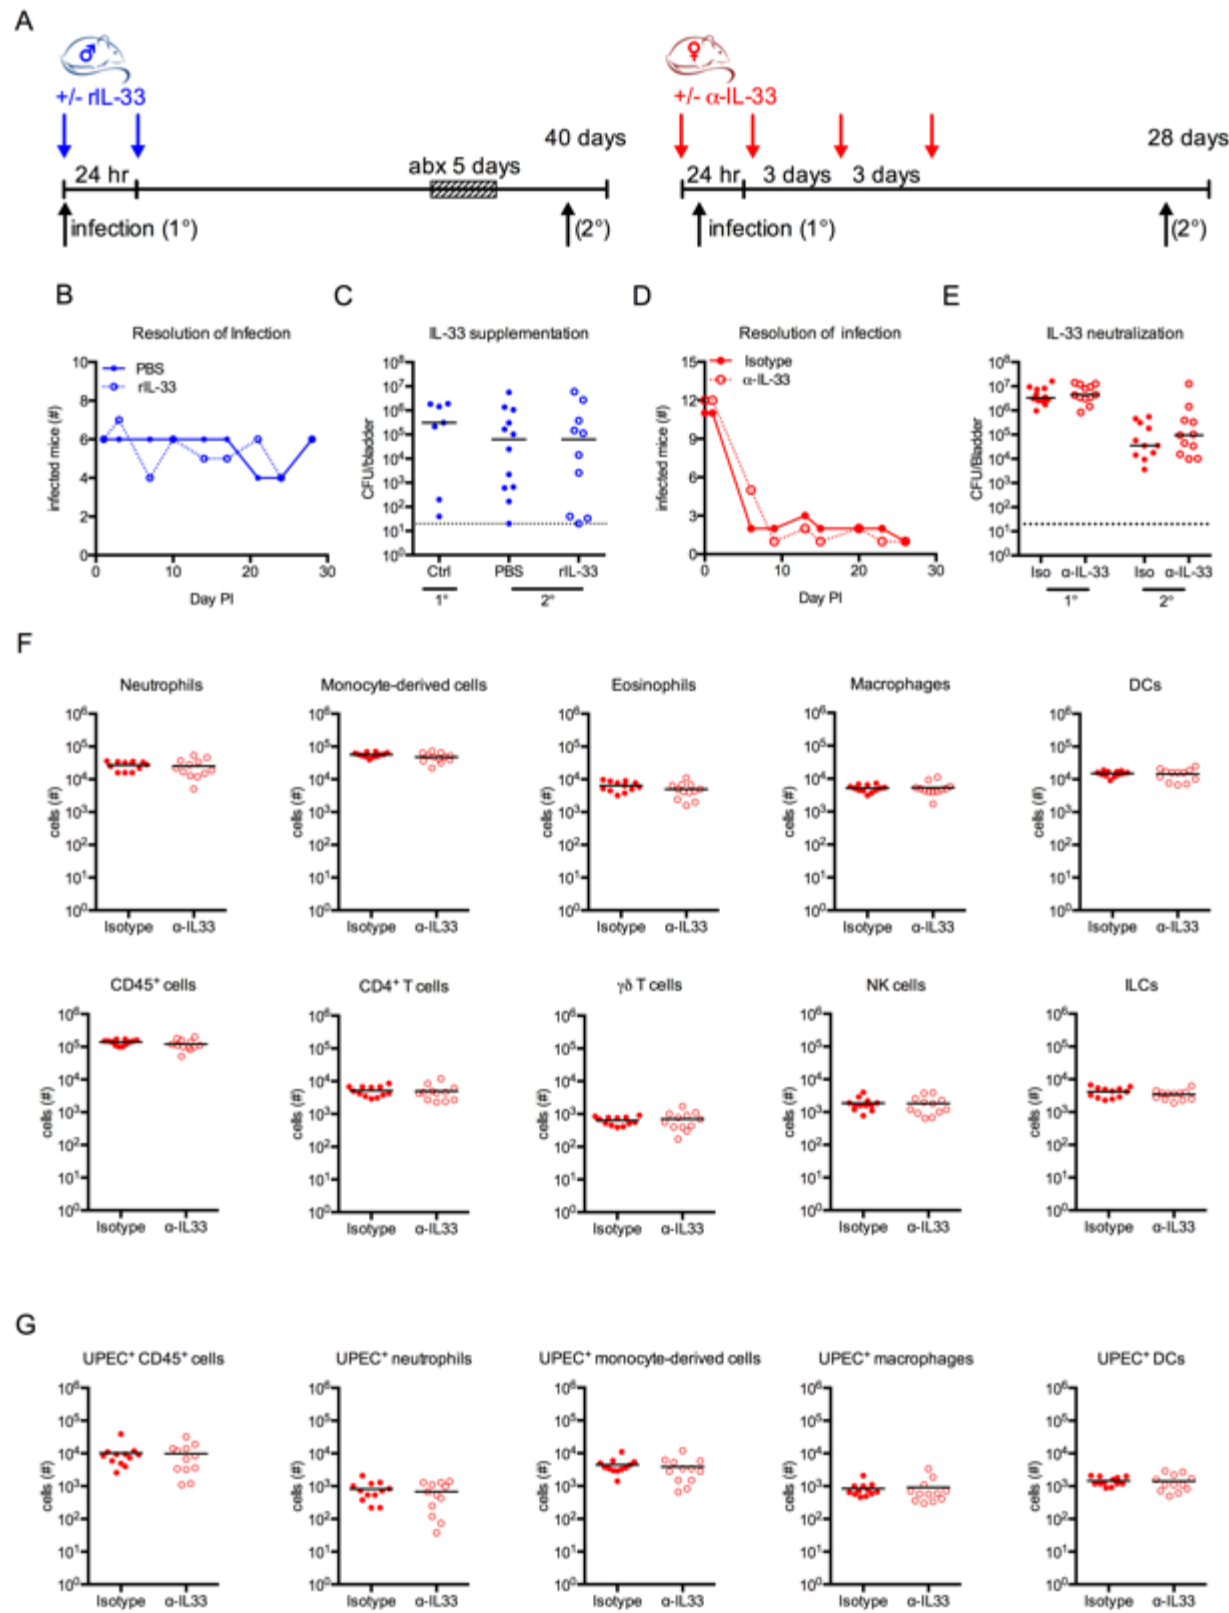

**Figure S5. Addition or neutralization of IL-33 does not change the course of infection in male or female mice, respectively.** (A) Experimental design in which male mice (blue) were supplemented with recombinant IL-33 (rIL-33) or female mice (red) were treated with  $\alpha$ -IL-33 neutralizing antibody. All mice were infected with  $10^7$  CFU UPEC and bacteriuria was assessed over time. (B-G) Graphs show (B) the number of infected male mice over time and (C) CFU at 24 hours post primary (1°) or challenge (2°) infection in the bladder, in PBS or rIL-33 treated male mice; (D) the number of infected female mice over time and (E) CFU at 24 hours post primary (1°) or challenge (2°) infection in the bladder, in isotype or  $\alpha$ -IL-33 treated female mice; and the absolute number of the (F) indicated immune cell populations and (G) UPEC<sup>+</sup> immune cell populations in bladders 24 hours PI in isotype or  $\alpha$ -IL-33 treated female mice. Data in B and D are representative experiments of 2 independent experiments, n=6 mice/group/experiment. In C, E-G, data are pooled from 2 experiments, n=4-6 mice/group in each experiment, each dot is one mouse, lines are medians. Mann-Whitney test, no statistically significant differences found.



**Figure S6.**

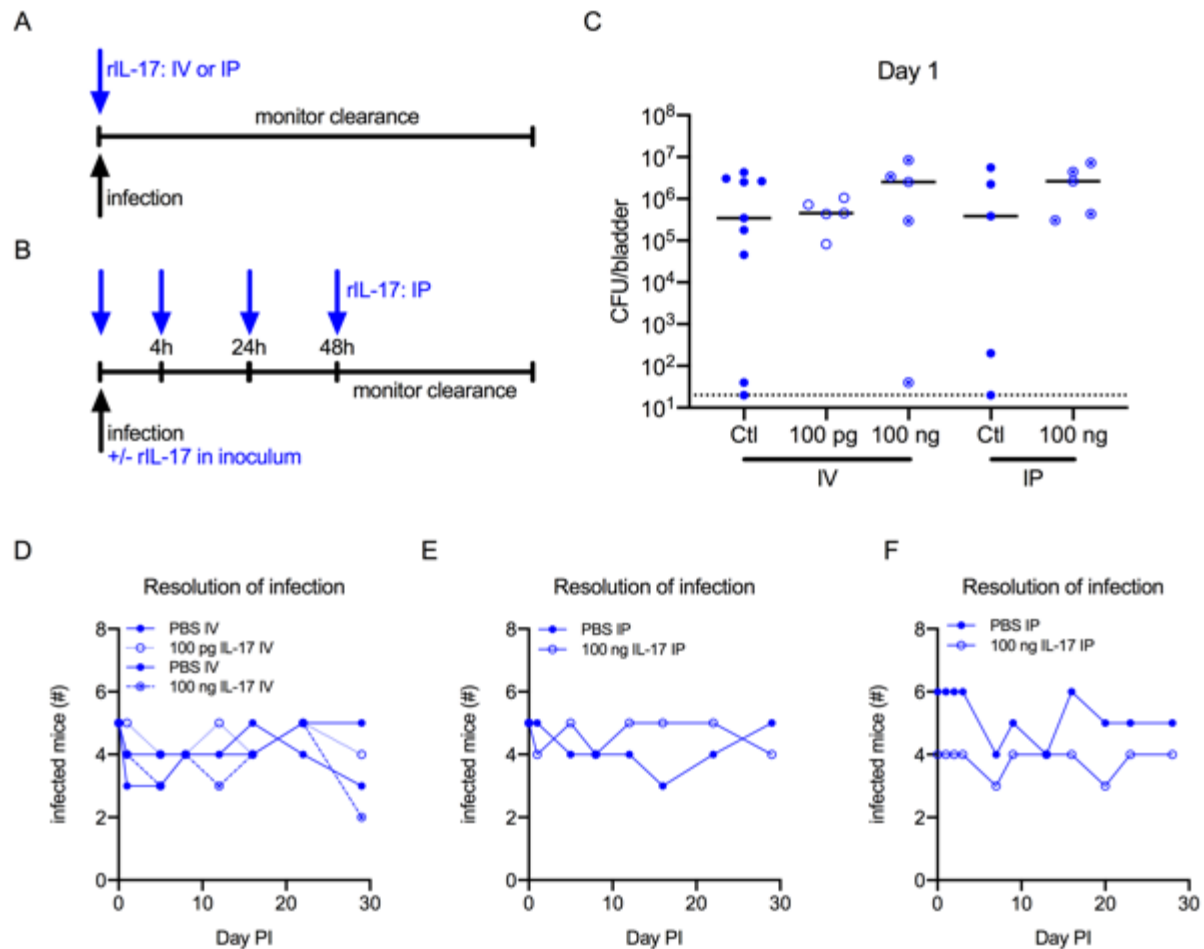

**Figure S6. Recombinant IL-17 does not change the course of infection in male mice. (A-B)** Experimental design in which male mice were supplemented with recombinant IL-17 (**A**) one time or (**B**) four times during infection. All mice were infected with  $10^7$  CFU UPEC and bacteriuria was assessed over time. (**C**) Graph shows CFU at 24 hours PI in the bladder, in male mice treated with PBS or rIL-17- one time. (**D-F**) Graphs show the number of infected male mice over time following (**D**) single intravenous, (**E**) single intraperitoneal, or (**F**) multiple intraperitoneal injections of IL-17. Each graph (**C-F**) depicts an independent experiment, n=4-6 mice/group/experiment. In **C**, each dot is one mouse, lines are medians, Ctl IV shows the control groups for 100 pg and 100 ng pooled together. Mann-Whitney test, no statistically significant differences.

**Table S1. Differentially expressed genes in *E. coli* stimulated donor blood.** Differentially expressed genes (DEG) following whole blood stimulation of 300 healthy female and 300 healthy male donors aged 20-49 years. Table shows p-values and q-values as determined by T-test and FDR T-test respectively, and fold change differences (values >1 reflect higher expression in females), between female and male whole blood stimulated with heat killed *E. coli*.

**Supplemental Table 2: Antibodies used in this study**

| <b>Molecule</b>               | <b>Clone</b>   | <b>Vendor</b> |
|-------------------------------|----------------|---------------|
| CD45                          | 30-F11         | BD Bioscience |
| CD64                          | X54-5/7.1      | BD Bioscience |
| CD103                         | M290           | BD Bioscience |
| CD11b                         | M1/70          | BD Bioscience |
| CD11c                         | N418           | eBioscience   |
| F4/80                         | CI:A3-1        | AbD Serotec   |
| Ly6C and Ly6G (Gr-1 antibody) | RB6-8C5        | BD Bioscience |
| Ly6G                          | 1A8            | BD Bioscience |
| Ly6C                          | AL-21          | BD Bioscience |
| MHC-II (I-A/I-E)              | M5 or 114.15.2 | eBioscience   |
| SiglecF                       | E50-2440       | BD Bioscience |
| CD3                           | 145-2C11       | BD Bioscience |
| CD4                           | RM4-5, GK1.5   | BD Bioscience |
| CD25                          | PC61           | BD Bioscience |
| CD90.2                        | 53.2.1         | ebioscience   |
| IL-4R $\alpha$ (CD124)        | mIL4R-M1       | BD Bioscience |
| TCR $\gamma/\delta$           | GL-3           | Biolegend     |
| NK1.1                         | PK136          | BD Bioscience |
